# Supplementary material
Source: MDPI journal article supplement (https://www.mdpi.com/2079-6412/12/4/426)
Supplement: s1 [file s1]

# Supplementary Materials: The Green Patina and Chromatic Alterations on Surfaces of Gypsum Plaster Casts by Lucio Fontana: Multidisciplinary Investigations in a Case Study of Contemporary Art

Silvia Bruni <sup>1</sup>, Federica Troiano <sup>2</sup>, Vittoria Guglielmi <sup>1</sup>, Margherita Longoni <sup>1</sup>, Francesca Cappitelli <sup>2,\*</sup> and Nicola G. Ludwig <sup>3</sup>

<sup>1</sup> Department of Chemistry, Università degli Studi di Milano, Via Golgi 19, 20133 Milano, Italy; silvia.bruni@unimi.it (S.B.); vittoria.guglielmi@unimi.it (V.G.); margherita.longoni@unimi.it (M.L.)

<sup>2</sup> Department of Food, Environmental and Nutritional Sciences, Università degli Studi di Milano, Via Celoria 2, 20133 Milano, Italy; federica.troiano@unimi.it

<sup>3</sup> Department of Physics, Università degli Studi di Milano, Via Celoria 16, 20133 Milano, Italy; nicola.ludwig@unimi.it

\* Correspondence: francesca.cappitelli@unimi.it; Tel.: +39-02-5031-9121

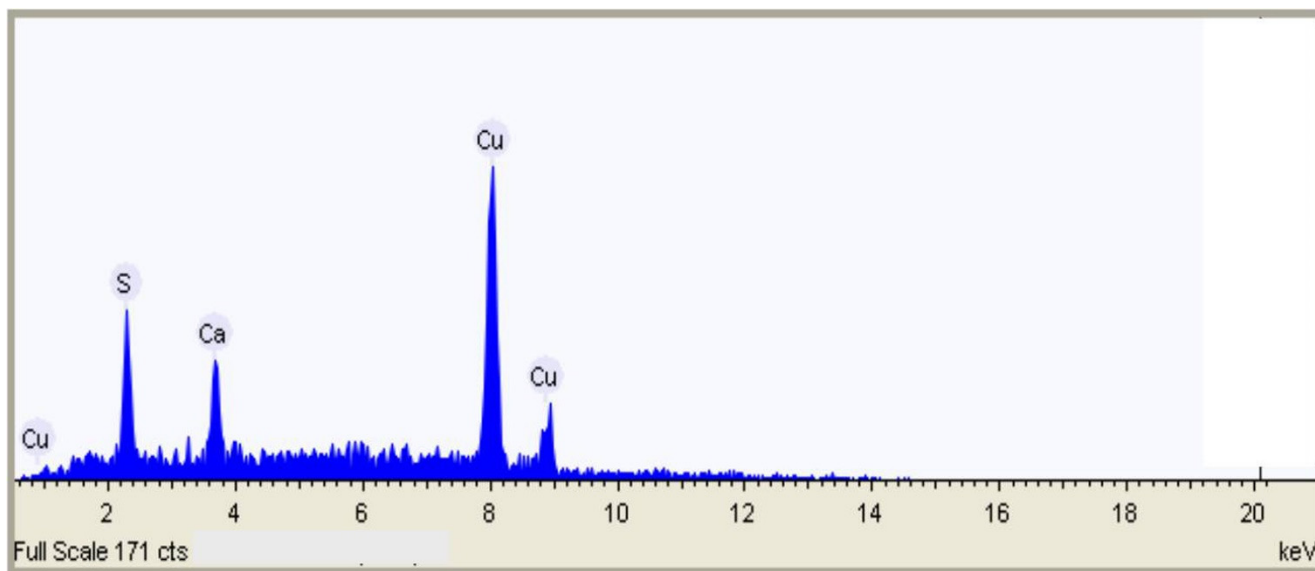

**Figure S1.** EDX spectrum obtained from SEM-EDX analysis of the green patina on a minute fragment detached from the plaster.
